# Supplementary material
Source: Springer Nature journal article supplement (https://www.springermedizin.de/resource/supplementary/13256_2012_2245_MOESM2_ESM.pdf/9649384)

a

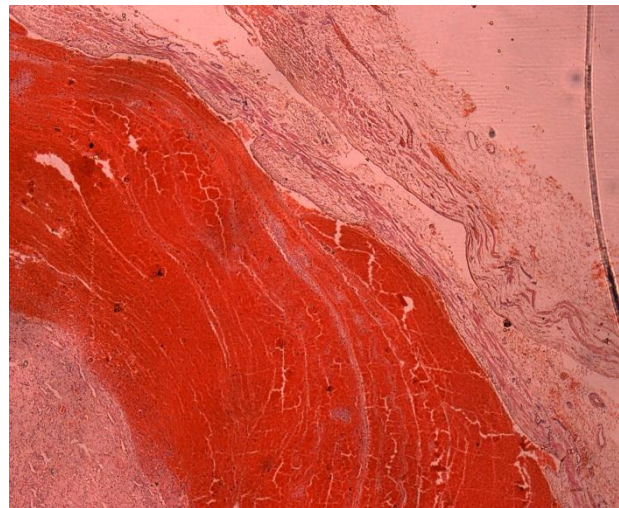

b

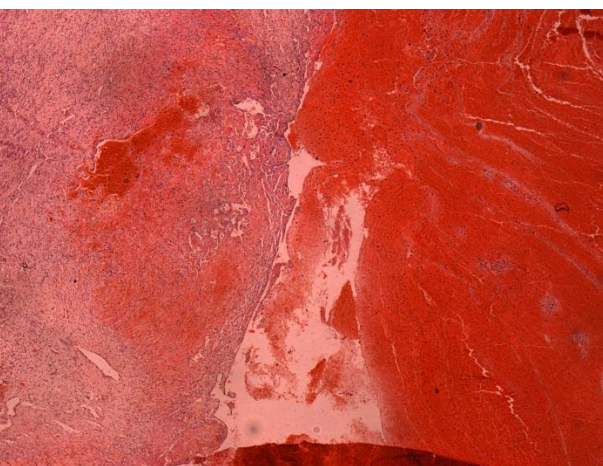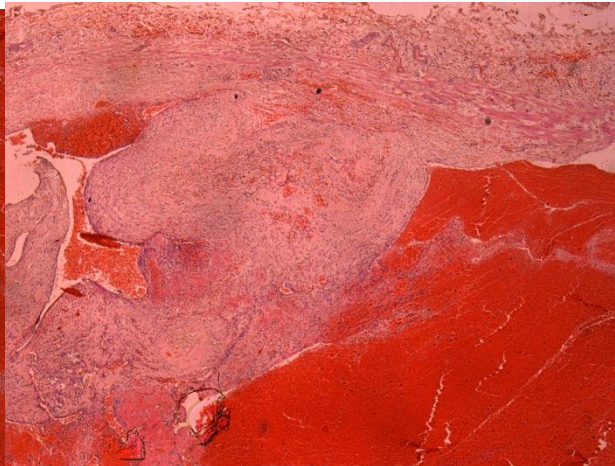

Supplement: MOESM2 [file 9649384]
